# Supplementary material for: Fingerprinting snakes: paleontological and paleoecological implications of zygantral growth rings in Serpentes
Source: PeerJ. 2018 May 25;6:e4819. doi: 10.7717/peerj.4819 (PMC5971835; doi:10.7717/peerj.4819)
Supplement: Supplemental Information 1 — Calculation of standard deviation (s) and 2s is included for Bogertophis subocularis. The so derived values for 2s (in %) are used to estimate whether vertebrae of Boavus occidentalis that are potentially from the same age are of similar size to allow assignment to the same individual. [file peerj-06-4819-s001.xlsx]

## Sheet: Morelia spilota
vertebra #	Centrum length (mm)	Growth lines left	Growth lines right	LAGs imaged	Comments
atlas has no zygantra
2	4.574		12		damaged
3	4.144	11			damaged
4	4.287	12	12		damaged
5	4.69	10	12		damaged
6	4.934	17	17				before lymphapophyses
7	5.156	12	17		damaged
8	5.376	17	17					left	%	right	%	both 17 vs 18 on either side	%
9	4.878	18	18				17	247	92.1642	240	89.2193	261	97.026
10	5.146	17	18				18	21	7.83582	29	10.7807	8	2.97398
11	5.52	17	17				total	268	100	269	100	269	100
12	5.289	18	17
13	5.52	17	17
14	5.99	17	17				tail	59 more with zygantra, 10 without
15	5.716	17	17
16	5.712	17	17					left	%	right	%	both	%
17	5.861	17	18				17	23	100	24	100	24	100
18	6.266	17	17				18	0	0	0	0	0	0
19	6.17	17	17				total	23	100	24	100	24	100
20	5.958	17	17
21	6.426	17	17
22	6.714	17	17				total
23	6.306	17	17
24	6.902	17	18					left	%	right	%	both	%
25	6.903	17	17				17	270	92.7835	265	90.1361	286	97.2789
26	6.694	17	17				18	21	7.21649	29	9.86395	8	2.72109
27	6.61	17	17				total	291	100	294	100	294	100
28	6.856	17	17
29	6.672	17	17
30	6.688	17	18
31	7.024	17	17				centrum length
32	6.875	17	17
33	6.617	17	17				mean	9.16309
34	6.914	17	17				std +/-	1.7918
35	6.802	17	17				std in %	19.5545
36	6.852	17	17				2s	12.7467
37	6.893	17	17				2s-	5.57949
38	7.183	17	18				2s in %	39.1091
39	7.135	17	17
40	7.144	17	17
41	7.142	17	17
42	7.577	18	17
43	7.635	17	17
44	7.743	17	17
45	7.373	17	18
46	7.255	17	17
47	7.275	17	17
48	7.506	18	17
49	7.239	17	17
50	7.484	17	17
51	7.394	17	17
52	7.484	17	17
53	7.818	17	18
54	8.125	17	17
55	8.052	17	18
56	8.267	18	18
57	7.932	17	17
58	8.135	17	17
59	8.097	17	17
60	8.323	17	17
61	8.209	17	17
62	8.414	17	17
63	8.244	17	17
64	8.338	17	17
65	8.336	17	17
66	8.333	17	17
67	8.354	17	17
68	8.581	17	17
69	8.86	17	17
70	8.666	17	17
71	8.512	17	17
72	8.887	17	17
73	8.89	17	17
74	8.789	17	17
75	9.097	17	17
76	8.742	17	17
77	9.06	17	17
78	9.134	17	17	x
79	9.089	17	17
80	9.137	17	18
81	9.214	17	17
82	9.313	17	17
83	9.736	17	17
84	9.808	17	18
85	9.688	17	17
86	9.37	17	17
87	9.383	17	17
88	9.389	17	18
89	9.228	18	17
90	9.598	17	17
91	10.073	17	17
92	9.882	17	17
93	9.87	17	17
94	10.171	18	17
95	9.731	17	17
96	10.004	17	17
97	10.388	17	17
98	10.51	18	18
99	10.648	18	17
100	9.965	17	17
101	10.712	17	17
102	10.544	17	17
103	10.49	17	17
104	10.913	17	17
105	10.506	17	17
106	10.085	17	18
107	10.927	18	18
108	10.798	17	17
109	10.721	17	17
110	10.848	17	17
111	11.204	17	18
112	11.035	17	17
113	10.94	17	17
114	10.675	17	17
115	10.693		17
116	10.699	17	17
117	10.757	17	17
118	11.072	17	17
119	10.661	17	17
120	10.817	17	17
121	10.541	17	17
122	11.049	17	17
123	10.483	17	17
124	11.059	17	17
125	10.616	17	17
126	10.926	17	17
127	10.724	17	17
128	10.58	17	17
129	10.757	17	17
130	11.007	17	17
131	11.183	17	17
132	11.145	17	17
133	11.049	17	17
134	10.902	17	17
135	11.279	17	17
136	10.652	17	18
137	11.598	17	17
138	11.174	18	17
139	11.02	17	18
140	11.056	17	17
141	10.996	17	17
142	11.333	17	17
143	10.942	17	17
144	11.318	17	17
145	11.084	17	17
146	11.008	17	17
147	11.427	17	17
148	11.594	17	17
149	11.426	17	17
150	12.106	18	17
151	11.238	17	17
152	11.396	17	17
153	11.095	17	17
154	11.548	17	17
155	11.455	17	17
156	11.648	17	17
157	11.545	17	17
158	11.575	17	17
159	11.301	17	17
160	11.33	17	17
161	11.344	17	17
162	11.293	18	17
163	11.23	17	17
164	11.54	17	17
165	11.446	17	18
166	11.296	15	18		damaged
167	11.252	18	18
168	11.366	17	17
169	11.344	17	17
170	11.29	17	17
171	10.961	17	17
172				could not be separated from 172
173	10.976	17	17
174	11.178	17	17
175	10.977	17	18
176	10.675	17	17
177	11.313	18	18
178	11.288	17	17
179	11.311	17	17
180	10.812	17	17
181	10.907	17	17
182	10.855	17	17
183	10.818	17	17
184	10.666	17	17
185	10.444	18	18
186	10.769	18	17
187	10.29	17	18
188	10.554	17	17
189	10.312	17	17
190	10.814	18	18
191	10.432	17	17
192	10.614	17	17
193	10.613	18	17
194	10.319	17	17
195	10.269	17	17
196	10.13	17	17
197	10.132	17	17
198	10.7	17	18
199	10.326	17	17
200	10.011	17	17
201	9.695	17	17
202	9.953	17	17
203	10.005	17	17
204	10.221	17	17
205	10.056	17	18
206	9.938	17	17
207	9.991	17	17
208	10.005	17	17
209	9.798	17	17
210	10.15	17	17
211	10.161	17	17
212	9.796	17	17
213	10.172	18	17
214	9.827	17	17
215	9.908	17	17
216	9.833	17	17
217	9.91	17	17
218	9.771	17	17
219	9.68	17	17
220	9.532	17	17
221	9.625	17	17
222	9.529	17	17
223	9.483	17	17
224	9.388	17	17
225	9.343	17	17
226	9.405	17	17
227	9.443	17	17
228	9.397	17	17
229	9.203	17	17
230	9.076	17	17
231	9.124	17	17
232	9.022	17	17
233	9.362	17	17
234	9.321	17	17
235	9.023	17	17
236	9.015	17	17
237	8.869	17	17
238	8.868	17	17
239	9.034	17	17
240	8.812	17	17
241	8.761	17	17
242	8.697	17	17
243	8.669	17	17
244	8.493	17	17
245	8.239	17	17
246	8.365	17	17
247	8.373	17	17
248	8.441	17	17
249	8.175	17	17
250	8.269	17	17
251	8.314	17	17
252	8.238	17	17
253	8.134	17	17
254	8	17	17
255	7.899	17	17
256	8.043	17	17
257	8.033	17	17
258	7.904	17	17
259	7.719	17	17
260	7.96	17	17
261	7.951	17	17
262	7.738	17	17
263	7.916	17	17
264	7.808	17	17
265	7.554	17	17
266	7.666	17	17
267	7.521	17	17
268	7.291	17	17
269	7.365	17	17
270	7.44	17	17
271	7.193	17	17
272	7.317	17	17
273	7.139	17	17
274	7.085	17	17
275	6.776	17	15		damaged
276	6.434	17	17
277		17	17
278		17	17
279		17	17
280		17	17
281		17	17
282		17	17
283		17	17
284		17	17
285		17	17
286		x	17
287		17	x
288		17	17
289		17	17
290		17	17
291		17	17
292		17	17
293		17	17
294		17	17
295		17	17
296		17	17
297		17	17
298		17	17
299		17	17
300		17	17
301		x	17
an additional 59 with zygantra and about 10 without

## Sheet: Candoia aspera
vertebra #	Centrum length (mm)	Growth lines left	Growth lines right	LAGs imaged
first 5 vertebrae still attached to skull
6	2.145	4	4
7	2.126	5	5
8	2.342	5	5
9	2.222	5	5
10	2.185	5	5				before lymphapophyses
11	2.313	5	5
12	2.469	5	5					left	%	right	%	both are 5 or either is 6	%
13	2.522	5	5				4	10	7.0922	7	5	4	2.83688
14	2.39	5	5				5	131	92.9078	133	95	137	97.1631
15	2.566	4	5				total	141	100	140	100	141	100
16	2.546	5	5
17	2.578	5	5
18	2.852	5	5				tail	17 more vertebrae in tail
19	2.975	5	5
20	2.852	5	5					left	%	right	%	both	%
21	2.874	5	5				4	2	20	4	40	2	20
22	2.867	5	5				5	8	80	6	60	8	80
23	3.014	5	5				total	10	100	10	100	10	100
24	3.075	5	5
25	3.022	5	5
26	3.007	5	5				total
27	3.054	5	5
28	2.928	5	5					left	%	right	%	both	%
29	3.008	5	5				4	12	7.94702	11	7.33333	6	3.97351
30	2.942	5	5				5	139	92.053	139	92.6667	145	96.0265
31	3.225	5	5				total	151	100	150	100	151	100
32	3.259	5	5
33	3.258	5	5
34	3.261	5	5
35	3.174	5	5				centrum length
36	3.326	5	4
37	3.305	5	5				mean	3.40427
38	3.461	5	4				std +/-	0.43252
39	3.465	5	5				std in %	12.7052
40	3.455	5	5				2s	4.26931
41	3.436	5	5				2s-	2.53923
42	3.422	4	5				2s in %	25.4104
43	3.381	5	5
44	3.44	5	5
45	3.665	5	5
46	3.467	5	5
47	3.699	5	5
48	3.544	5	5
49	3.657	5	5
50	3.714	4	5
51	3.816	5	5
52	3.616	5	5
53	3.72	5	5
54	3.615	5	5
55	3.827	5	5
56	3.747	5	5
57	3.714	4	5
58	3.784	5	5
59	3.742	5	5
60	3.641	5	5
61	3.83	5	5
62	3.751	5	5
63	3.655	5	5
64	3.72	5	5
65	3.701	5	5
66	3.634	5	5
67	3.776	5	5
68	3.529	5	5
69	3.797	5	5
70	3.752	5	5
71	3.606	5	5
72	3.752	5	5
73	3.789	5	5
74	3.693	5	5
75	3.713	5	5
76	3.62	5	5
77	3.634	5	5
78	3.674	5	5
79	3.693	5	5
80	3.744	5	5
81	3.712	5	5
82	3.839	5	5
83	3.826	5	5
84	3.859	5	4
85	3.89	5	5
86	3.819	5	5
87	3.699	5	5
88	3.83	5	5
89	3.753	5	5
90	3.63	5	5
91	3.852	5	5
92	3.723	5	5
93	3.822	5	5
94	3.773	5	5
95	3.715	5	5
96	3.648	5	5
97	3.762	5	5
98	3.686	5	5
99	3.771	5	5
100	3.724	5	5
101	3.671	5	5
102	3.624	5	5
103	3.691	5	5
104	3.928	5	5
105	3.705	5	5
106	3.772	5	5
107	3.904	5	5
108	3.818	5	5
109	3.765	5	5
110	3.786	5	4
111	3.752	4	4
112	3.82	5	5
113	3.558	5	5
114	3.647	5	5
115	3.645	5	5
116	3.591	4	5
117	3.446	5	5
118	3.506	5	5
119	3.553	5	5
120	3.596	5	5
121	3.626	5	5
122	3.58	5	5
123	3.6	5	5
124	3.469	5	5
125	3.406	5	5	x
126	3.494	5	5
127	3.428	5	5
128	3.451	4	4
129	3.298	5	5
130	3.397	5	5
131	3.259	5	5
132	3.33		5
133	3.197	5	5
134	3.337	5	4
135	3.244	5	5
136	3.274	5	5
137	3.145	5	5
138	3.177	5	5
139	3.003	5	5
140	2.949	5	5
141	3.116	5	5
142	3.004	5	4
143	2.911	5	5
144	2.97	5	5
145	2.821	5	5
146	2.632	5	5
147		5	5
148		5	4
149		5	5
150		4	4
151		5	5
152		5	5
153		5	5
154		5	4
155		4	4
156		5	5
17 more vertebrae in tail

## Sheet: Bitis rhinoceros
vertebra #	Centrum length (mm)	Growth lines left	Growth lines right	LAGs imaged	Comments
Atlas is missing
2	5.258	5			damaged
3	5.309	5	6		damaged
4	5.369	5	5		damaged
5	5.41	6	6		damaged		pre-lymphapophyseals
6	5.772	6	6		damaged			left	%	right	%	both	%
7	5.919	5	6		damaged		5	18	13.7405	24	18.3206	7	5.34351
8	5.975	6	6				6	113	86.2595	107	81.6794	124	94.6565
9	5.963	5	6		damaged		total	131	100	131	100	131	100
10	6.137	6	6
11	6.526	6	6
12	6.492	6	6				tail	11 did not show zygantra
13	6.557	6	6
14	6.54	6	6					left	%	right	%	both	%
15	6.815	6	6				5	3	42.8571	2	28.5714	2	28.5714
16	6.644	6	6				6	4	57.1429	5	71.4286	5	71.4286
17	6.927	6	6				total	7	100	7	100	7	100
18	7.286	6	6
19	7.298	6	6
20	7.296	6	6				total
21	7.359	6	5
22	7.591	6	6					left	%	right	%	both	%
23	7.691	6	6				5	21	15.2174	26	18.8406	9	6.52174
24	8.14	6	5				6	117	84.7826	112	81.1594	129	93.4783
25	7.422	6	6				total	138	100	138	100	138	100
26	7.987	6	6
27	7.923	6	6
28	8.07	6	6
29	8.4	6	6
30	8.56	6	6
31	8.673	6	6
32	8.889	6	5				centrum length
33	8.775	5	5
34	8.977	5	5				mean	9.40807
35	9.323	6	6				std +/-	1.83022
36	9.305	6	6				std in %	19.4537
37	9.168	6	5				2s	13.0685
38	9.503	6	6				2s-	5.74763
39	9.642	6	6				2s in %	38.9074
40	9.678	6	5
41	9.554	6	6
42	10.031	6	6
43	9.752	5	5
44	9.609	6	6
45	10.213	6	6
46	10.412	6	6
47	10.348	5	6
48	10.519	6	6
49	10.807	6	5
50	10.242	6	6
51	10.356	6	6
52	10.609	6	6
53	10.61	6	5
54	10.855	6	6
55	11.327	6	5
56	11.072	5	5
57	10.999	5	6
58	10.868	6	6
59	11.533	6	5
60	10.54	6	5
61	11.437	6	6
62	10.919	6	6
63	11.08	6	6
64	11.55	6	6
65	11.673	6	6
66	11.127	6	6
67	10.873	6	6
68	10.811	6	6
69	11.17	6	5
70	10.538	5	6
71	11.086	6	6
72	11.191	6	6
73	11.165	6	6
74	11.196	6	6
75	10.89	6	5
76	11.097	6	6
77	11.454	6	6
78	11.64	6	6
79	12	6	6
80	11.606	6	5
81	11.1	6	6
82	10.836	6	6
83	10.403	6	6
84	11.002	6	6
85	11.293	6	6
86	10.792	6	6
87	11.702	6	6
88	11.745	6	6
89	11.673	6	5
90	11.245	5	5
91	11.11	5	5
92	11.473	6	6
93	11.195	5	5
94	10.673	6	6
95	10.734	6	6
96	11.342	6	6
97	10.858	6	6
98	10.388	6	6
99	10.761	6	6
100	10.742	6	6
101	10.565	5	6
102	10.886	6	6
103	10.602	6	5
104	10.912	6	6
105	10.736	6	6
106	10.305	6	6
107	10.288	6	6
108	9.95	6	6	x
109	9.491	6	6
110	9.569	5	5
111	9.97	6	6
112	9.494	6	6
113	9.614	6	6
114	9.495	6	6
115	9.681	6	6
116	9.458	5	6
117	9.298	6	6
118	9.123	6	6
119	9.275	6	6
120	8.897	6	6
121	8.873	6	6
122	8.542	6	6
123	8.251	6	6
124	8.248	6	6
125	8.225	6	6
126	7.67	6	6
127	7.942	6	6
128	7.653	6	6
129	7.007	6	6
130	6.761	6	6
131	6.326	6	6
132	6.285	6	6
133	6.078	6	6
134		5	5
135		6	6
136		5	6
137		5	5
138		6	6
139		6	6
140		6	6
11 more vertebrae did not show zygantra; 12 tail verts were loose

## Sheet: Rhabdophis tigrinus
vertebra #	Centrum length (mm)	Growth lines left	Growth lines right	LAGs imaged
atlas and axis are still connected to skull
3	3.606	4	4
4	3.759	4	4
5	3.734	4	4
6	4.098	4	4
7	4.257	4	4				before lymphapophyses
8	4.285	4	4
9	4.402	4	4					left	%	right	%	both 4 or either one 5	%
10	4.6	4	4				3	6	3.84615	11	7.00637	4	2.54777
11	4.663	4	4				4	150	96.1538	146	92.9936	153	97.4522
12	4.559	4	4				total	156	100	157	100	157	100
13	4.614	4	4
14	4.819	4	4
15	4.923	4	3				tail
16	4.989	4	4
17	5.009	4	4					left	%	right	%	both	%
18	4.966	4	4				3	5	13.5135	7	18.9189	2	5.40541
19	5.255	4	4				4	32	86.4865	30	81.0811	35	94.5946
20	5.263	4	4				total	37	100	37	100	37	100
21	5.174	4	3
22	5.289	4	4
23	5.37	4	4				total
24	5.533	4	4
25	5.73	4	4					left	%	right	%	both	%
26	5.401	4	4				3	11	5.69948	18	9.27835	6	3.09278
27	5.659	4	4				4	182	94.3005	176	90.7216	188	96.9072
28	5.629	4	4				total	193	100	194	100	194	100
29	5.703	4	4
30	5.738	3	4
31	5.752	4	4
32	5.633	4	4				centrum length
33	5.815	4	3
34	5.574	3	3				mean	5.77997
35	5.782	4	4				std +/-	0.562382
36	5.733	4	4				std in %	9.72984
37	5.81	4	4				2s	6.90473
38	5.861	4	4				2s-	4.6552
39	6.078	4	4				2s in %	19.4597
40	5.893	4	3
41	6.127	4	4
42	6.101	4	4
43	5.986	4	4
44	6.04	4	4
45	5.982	4	4
46	5.962	4	4
47	5.903	4	4
48	6.025	4	4
49	6.092	4	4
50	6.247	4	4
51	6.076	4	4
52	6.012	4	4
53	6.3	4	4
54	6.17	4	4
55	6.284	4	4
56	6.283	4	4
57	6.223	4	4
58	6.312	4	4
59	6.358	4	3
60	6.217	4	4
61	6.382	4	4
62	6.238	4	4
63	6.33	3	3
64	6.456	4	4
65	6.373	4	4
66	6.404	4	4
67	6.436	4	4
68	6.428	4	4
69	6.247	4	4
70	6.541	4	4
71	6.366	4	4
72	6.51	4	4
73	6.321	4	4
74	6.461	4	4
75	6.395	4	4
76	6.355	4	4
77	6.443	4	4
78	6.201	4	4
79	6.342	4	4
80	6.206	4	4
81	6.206	4	4
82	6.13	4	4
83	6.234	4	4
84	6.268	4	3
85	6.031	4	4
86	6.124	4	4
87	6.331	4	4
88	6.13	4	4
89	5.903	4	4
90	6.105	4	4
91	6.215	4	4
92	6.313	4	4
93	6.22	4	4
94	6.05	4	4
95	6.234	4	4
96	5.814	4	4
97	6.033	4	4
98	6.228	4	4
99	6.147	4	4
100	6.071	4	4
101	6.223	4	4
102	5.973	4	4
103	6.102	3	3
104	6.129	4	4
105	6.098	4	4
106	6.047	4	4
107	5.976		4
108	6.069	4	4
109	6.117	4	4
110	6.068	4	4
111	5.935	4	4
112	6.14	4	4
113	6.009	4	4
114	6.034	4	4
115	5.98	4	3
116	5.907	4	4
117	5.966	4	4
118	5.845	4	4
119	5.914	4	4
120	5.783	4	4	x
121	5.719	4	4
122	5.888	4	4
123	5.769	4	4
124	5.634	4	4
125	5.733	4	4
126	5.741	4	4
127	5.678	4	4
128	5.635	4	4
129	5.767	4	4
130	5.758	4	4
131	5.617	4	4
132	5.603	4	4
133	5.644	3	3
134	5.532	4	4
135	5.58	4	4
136	5.553	4	4
137	5.57	4	4
138	5.549	4	4
139	5.496	4	4
140	5.386	4	4
141	5.348	4	4
142	5.308	4	4
143	5.421	4	4
144	5.238	4	4
145	5.143	4	4
146	5.173	4	4
147	5.216	4	4
148	5.202	4	4
149	5.114	4	4
150	5.051	4	4
151	4.947	4	4
152	4.934	4	4
153	4.967	3	4
154	4.884	4	4
155	4.811	4	4
156	4.705	4	4
157	4.535	4	4
158	4.197	4	4
159	3.756	4	4
160		4	3
161		4	4
162		4	4
163		4	4
164		4	4
165		4	4
166		4	3
167		4	4
168		4	4
169		4	4
170		4	4
171		3	3
172		4	4
173		4	4
174		4	4
175		4	4
176		4	4
177		4	4
178		4	4
179		4	4
180		4	4
181		4	4
182		4	4
183		4	3
184		4	3
185		3	4
186		3	4
187		4	4
188		4	4
189		4	4
190		3	4
191		4	4
192		4	3
193		3	3
194		4	4
195		4	4
196		4	4

## Sheet: Euprepiophis mandarinus
vertebra #	Centrum length (mm)	Growth lines left	Growth lines right	LAGs imaged
at least the first two vertebrae in the neck are missing
3	2.358	5	6
4	2.381	6	6
5	2.634	6	6
6	2.785	6	6
7	2.772	6	6				before lymphapophyses
8	3.01	6	6
9	2.754	6	6					left	%	right	%	both	%
10	2.969	6	6				5	22	9.90991	20	9.00901	6	2.7027
11	3.154	6	6				6	200	90.0901	202	90.991	216	97.2973
12	3.158	6	5				total	222	100	222	100	222	100
13	3.226	5	6
14	2.957	6	6
15	3.255	6	5				tail	13 did not show zygantra
16	3.347	6	6
17	3.411	6	6					left	%	right	%	both	%
18	3.223	6	6				5	19	29.6875	16	25	6	9.375
19	3.348	6	6				6	45	70.3125	48	75	58	90.625
20	3.517	6	6				total	64	100	64	100	64	100
21	3.36	6	6
22	3.531	6	6
23	3.54	5	6				total
24	3.494	6	6
25	3.483	6	6					left	%	right	%	both	%
26	3.674	5	5				5	41	14.3357	36	12.5874	12	4.1958
27	3.482	6	6				6	245	85.6643	250	87.4126	274	95.8042
28	3.663	6	6				total	286	100	286	100	286	100
29	3.601	6	6
30	3.686	6	6
31	3.716	6	6
32	3.672	6	6
33	3.712	5	6
34	3.701	6	6
35	3.69	6	6				centrum length
36	3.815	6	5
37	3.701	6	6				mean	3.9908
38	3.708	6	6				std +/-	0.397995
39	3.73	6	6				std in %	9.97281
40	3.814	6	6				2s	4.78679
41	3.894	5	6				2s-	3.19481
42	3.937	6	6				2s in %	19.9456
43	4.131	6	6
44	3.932	6	6
45	3.965	6	5
46	3.943	6	6
47	4	6	6
48	4.09	6	6
49	3.977	5	5
50	4.065	5	6
51	3.977	6	5
52	3.943	6	6
53	3.846	5	5
54	4.055	6	6
55	3.893	5	6
56	3.95	6	6
57	4.082	6	6
58	4.082	6	6
59	4.027	6	6
60	4.05	6	6
61	4.107	5	6
62	4.092	6	6
63	4.209	6	6
64	4.269	6	6
65	4.149	6	6
66	4.141	6	6
67	4.187	6	5
68	4.179	6	6
69	4.209	6	6
70	4.08	6	6
71	4.105	6	6
72	4.314	6	6
73	4.281	6	6
74	4.354	6	6
75	4.171	6	6
76	4.232	6	5
77	3.958	5	6
78	4.311	6	5
79	4.358	6	6
80	4.227	6	6
81	4.317	6	6
82	4.364	6	6
83	4.22	6	5
84	4.266	6	6
85	4.31	6	6
86	4.218	6	6
87	4.335	6	6
88	4.175	6	6
89	4.379	6	6
90	4.3	6	6
91	4.196	6	6
92	4.397	6	6
93	4.418	6	6
94	4.362	5	6
95	4.418	6	6
96	4.057	6	6
97	4.446	6	6
98	4.311	5	5
99	4.244	6	6
100	4.371	6	6
101	4.255	6	6
102	4.307	5	5
103	4.307	6	6
104	4.262	6	6
105	4.272	6	6
106	4.141	6	6
107	4.121	6	6
108	3.996	6	5
109	4.228	6	6
110	4.376	6	6
111	4.383	6	6
112	4.333	6	6
113	4.177	5	6
114	4.37	6	6
115	4.293	6	6
116	4.275	6	6
117	4.299	6	6
118	4.388	6	6
119	4.21	6	6
120	4.126	6	6
121	4.028	5	6
122	4.469	6	5
123	4.379	6	5
124	4.218	6	6
125	4.249	6	6
126	4.346	6	6
127	4.373	6	6
128	4.149	6	6
129	4.195	6	6
130	4.344	6	6
131	4.294	6	6
132	4.222	6	6
133	4.286	5	6
134	4.36	6	6
135	4.403	6	6
136	4.441	6	6
137	4.107	6	6
138	4.415	6	6
139	4.442	6	6
140	4.295	6	6
141	4.38	6	6
142	4.284	6	6
143	4.303	6	6
144	4.371	6	6
145	4.312	6	6
146	4.18	6	6
147	4.329	6	6
148	4.223	6	6
149	4.323	6	6
150	4.407	6	6
151	4.371	5	6
152	4.195	6	6
153	4.145	6	6
154	4.366	6	6
155	4.273	6	6
156	4.348	6	6
157	4.217	5	6
158	4.242	6	6
159	4.282	6	6
160	4.072	6	6
161	4.207	6	6
162	4.021	6	6
163	4.193	6	6
164	4.267	6	6
165	4.132	6	5
166	4.254	6	6
167	4.342	6	6
168	4.111	6	6
169	4.239	6	6
170	4.237	6	6
171	3.971	6	6
172	4.114	6	6
173	4.18	6	6
174	4.24	6	6
175	4.074	6	6
176	4.04	6	6
177	3.971	6	6
178	4.055	6	6
179	4.266	6	6
180	4.067	6	6
181	3.978	6	6
182	4.071	6	6
183	4.115	6	6
184	4.114	6	6
185	3.92	6	6
186	4.226	6	6
187	3.999	6	6	x
188	4.092	6	6
189	4.029	6	6
190	3.981	6	6
191	4.009	6	5
192	4.06	5	6
193	3.982	6	6
194	4.077	6	6
195	4.152	6	6
196	4.046	6	6
197	3.901	6	6
198	3.849	6	6
199	4.065	6	6
200	4.141	6	6
201	4.08	6	6
202	3.929	6	6
203	3.922	6	6
204	4.036	6	6
205	4.026	6	6
206	3.597	5	5
207	3.715	6	6
208	3.827	6	6
209	3.967	6	6
210	3.662	6	6
211	3.737	6	6
212	3.622	6	6
213	3.688	6	6
214	3.754	6	6
215	3.623	6	6
216	3.57	6	6
217	3.564	6	6
218	3.517	6	6
219	3.458	6	6
220	3.423	6	6
221	3.594	6	6
222	3.62	6	6
223	3.433	6	6
224	3.14	6	6
225		5	6		first vert with lymphapophyses
226		6	6
227		6	6
228		6	6
229		6	6
230		6	6
231		5	6
232		6	5
233		6	6
234		5	6
235		5	6
236		6	6
237		6	6
238		5	6
239		6	5
240		6	5
241		6	6
242		6	5
243		5	6
244		6	6
245		6	6
246		6	6
247		6	6
248		6	5
249		6	5
250		6	6
251		6	6
252		6	6
253		6	6
254		6	6
255		6	5
256		5	5
257		6	6
258		6	6
259		6	6
260		5	6
261		6	5
262		5	5
263		5	5
264		6	6
265		6	6
266		6	6
267		6	6
268		5	6
269		6	5
270		5	6
271		6	6
272		6	6
273		5	6
274		6	6
275		6	6
276		6	5
277		5	6
278		5	6
279		5	5
280		6	6
281		6	6
282		6	6
283		6	6
284		6	6
285		5	6
286		6	6
287		5	5
288		5	5
13 more vertebrae did not show zygantra

## Sheet: Bogertophis subocularis
vertebra #	Centrum length (mm)	Growth lines left	Growth lines right	lines on cotyle	zygantrum imaged	Comments
first 4 vertebrae were attached to head
5	2.056	2	2	1
6	2.09	1	2	1
7	2.134	2	2	1
8	2.045	2	2	1
9	2.067	2	2	1			before lymphapophyses								cotyle
10	2.085	2	2	1
11	2.097	2	2	1				left	%	right	%	both 1 or either one has 2	%		lines from center to rim	#	% of vertebrae show it
12	2.15	2	2	1			1	22	9.2827	18	7.56303	5	2.10084		color change	159	66.8067
13	2.18	2	2	2			2	215	90.7173	220	92.437	233	97.8992		texture change	238	100
14	2.154	2	2	1			total	237	100	238	100	238	100		1. line in glassy	13	5.46218
15	2.139	2	2	1											2. line in glassy	9	3.78151
16	2.142	2	2	1											total	238
17	2.183	2	2	1			tail	no tail vertebrae
18	2.175	2	2	1
19	2.236	2	2	1
20	2.325	2	2	2			centrum length
21	2.263	2	2	1
22	2.354	2	2	1			mean	2.51965
23	2.265	1	2	2			std +/-	0.255172
24	2.311	2	2	1			std in %	10.1273
25	2.308	2	2	1			2s	3.03
26	2.364	2	2	1			2s-	2.00931
27	2.328	2	2	1			2s in %	20.2545
28	2.343	2	2	1
29	2.275	1	2	1
30	2.331	2	2	1
31	2.414	1	2	2
32	2.325	2	1	2
33	2.368	2	2	2
34	2.449	2	2	1
35	2.443	2	2	2
36	2.465	2	2	2
37	2.482	2	2	1
38	2.423	2	2	1
39	2.449	1	1	1
40	2.505	2	2	2
41	2.499	2	2	2
42	2.479	1	2	2
43	2.506	2	2	2
44	2.456	2	2	2
45	2.516	2	2	2
46	2.503	2	2	2
47	2.608	2	2	2
48	2.556	2	2	2
49	2.573	2	2	2
50	2.598	2	2	2
51	2.548	2	2	2
52	2.515	2	2	2
53	2.583	2	2	2
54	2.573	2	2	2
55	2.592	2	2	2
56	2.585	2	2	2
57	2.556	2	2	2
58	2.627	2	2	2
59	2.558	2	2	2
60	2.568	2	2	2
61	2.576	2	2	2
62	2.631	2	2	2
63	2.61	2	2	2
64	2.613	2	2	2
65	2.688	2	2	2
66	2.675	2	2	2
67	2.668	2	1	3
68	2.66	2	2	3
69	2.708	2	2	2
70	2.665	1	1	2
71	2.65	2	2	2
72	2.719	1	2	2
73	2.651	2	2	2
74	2.663	2	2	2
75	2.695	2	1	2
76	2.763	2	2	2
77	2.706	2	2	2
78	2.714	2	2	2
79	2.711	2	2	2
80	2.716	2	2	2
81	2.701	2	2	2
82	2.751	2	2	2
83	2.71	2	2	2
84	2.737	2	1	2
85	2.763	2	2	2
86	2.852	2	2	2
87	2.742	1	2	2
88	2.757	2	2	2
89	2.742	2	2	2
90	2.822	2	2	2
91	2.789	2	2	2
92	2.813	2	2	2
93	2.755	2	2	3
94	2.793	2	2	2
95	2.838	2	2	2
96	2.771	2	2	2
97	2.759	2	2	2
98	2.763	2	2	2
99	2.846	2	2	3
100	2.745	2	2	2
101	2.774	2	2	2
102	2.796	2	2	2
103	2.787	1	2	2
104	2.812	2	2	2
105	2.872	2	2	2
106	2.905	2	2	2
107	2.816	2	2	2
108	2.831	2	2	2
109	2.882	2	2	2
110	2.823	2	2	2
111	2.795	2	2	2
112	2.86	2	2	2
113	2.802	2	2	2
114	2.739	2	2	3
115	2.835	2	2	2
116	2.894	1	2	2
117	2.892	2	2	2
118	2.945	2	2	2
119	2.876	2	2	2
120	2.846	1	2	4
121	2.91	2	2	2
122	2.81	2	2	2
123	2.801	2	2	2
124	2.715	2	2	2
125	2.793	2	2	2
126	2.755	2	2	2
127	2.716	2	2	4
128	2.693	2	1	2
129	2.746	2	2	2
130	2.755	1	2	2
131	2.713	1	1	3		selected for thin-sectioning of vertebra and rib
132	2.836	2	2	2		selected for thin-sectioning of vertebra and rib
133	2.811	2	2	2
134	2.767	2	2	4
135	2.663	2	2	2
136	2.653	2	2	3
137	2.763	2	2	2
138	2.735	2	2	4
139	2.736	2	2	2
140	2.681	2	2	4
141	2.702	1	2	2
142	2.696	2	2	2
143	2.72	2	2	4
144	2.777	2	1	3
145	2.77	2	2	4
146	2.684	2	2	2
147	2.759	2	2	4
148	2.702	2	2	3
149	2.635	2	2	2
150	2.606	2	2	4
151	2.65	2	2	3
152	2.636	2	2	2
153	2.637	2	2	2
154	2.675	2	2	2
155	2.664	1	2	3
156	2.629	2	2	2
157	2.741	2	2	2
158	2.637	2	2	2
159	2.556	2	2	2
160	2.564	2	1	2
161	2.599	2	2	3
162	2.667	2	2	2
163	2.626	2	2	2
164	2.653		1	2
165	2.548	2	2	2
166	2.622	2	2	2
167	2.623	2	2	3
168	2.647	1	1	2
169	2.642	2	2	2
170	2.624	2	1	2
171	2.587	2	2	2
172	2.555	2	2	2
173	2.549	2	2	2
174	2.493	2	2	2
175	2.544	2	2	2
176	2.529	1	1	2
177	2.47	2	2	2
178	2.56	2	2	2
179	2.537	2	2	2
180	2.502	2	2	2
181	2.44	1	2	2
182	2.538	2	2	2
183	2.574	2	2	2
184	2.576	2	2	2
185	2.481	2	2	2
186	2.457	2	2	2
187	2.538	2	2	2
188	2.538	2	2	2
189	2.528	2	2	2
190	2.42	2	2	2
191	2.548	2	2	2
192	2.454	2	2	2
193	2.478	1	2	1
194	2.506	2	2	2
195	2.524	2	1	2
196	2.494	2	2	1
197	2.509	2	1	2
198	2.502	2	1	1
199	2.484	1	2	2
200	2.436	2	2	2
201	2.461	2	1	2
202	2.333	2	2	1
203	2.413	2	2	2
204	2.383	2	2	1
205	2.401	2	2	1
206	2.399	2	2	1
207	2.408	2	2	2
208	2.386	2	2	1
209	2.403	2	2	1
210	2.363	2	2	2
211	2.375	2	2	1
212	2.34	2	2	2
213	2.344	2	2	1
214	2.318	2	2	2
215	2.292	2	2	2
216	2.278	2	2	2
217	2.167	2	2	2
218	2.2	2	2	2
219	2.232	2	2	2
220	2.194	2	2	2
221	2.212	2	2	2
222	2.179	2	2	1
223	2.121	2	2	1
224	2.217	2	2	2
225	2.145	2	2	2
226	2.085	2	2	1
227	2.105	2	2	1
228	2.072	1	2	1
229	2.105	2	2	1
230	2.103	2	2	1
231	2.062	2	2	1
232	2.068	2	2	1
233	2.071	2	2	1
234	2.037	2	2	1
235	1.978	2	2	1
236	1.933	2	2	1
237	1.949	2	2	1
238	1.933	2	2	1
239	1.85	2	2	1
240	1.798	2	2	1
241	1.709	2	2	1
242	1.726	2	2	1
no tail vertebrae

## Sheet: Boavus occidentalis (YPM 2770)
vertebra #	LAGs	centrum length (mm)	comment	New YPM number
1	6	8.798		59189
2	8	10.407		59190
3	8	10.908		59190
4	9	10.665		59191
5	9	10.98		59191
6	10	9.663		59191
7	11		just the zygantrum	59192
8	13	10.581		59193
At σ = 12.7%
LAGs	centrum length	centrum length *( 1.127)	centrum length * (1.254)	centrum length * (0.873)	centrum length * (0.746)
6	8.798	9.91535	11.0327	7.68065	6.56331
8	10.407	11.7287	13.0504	9.08531	7.76362
8	10.908	12.2933	13.6786	9.52268	8.13737
9	10.665	12.0195	13.3739	9.31054	7.95609
9	10.98	12.3745	13.7689	9.58554	8.19108
10	9.663	10.8902	12.1174	8.4358	7.2086
11
13	10.581	11.9248	13.2686	9.23721	7.89343
At σ = 19.6%
LAGs	centrum length	centrum length *( 1.196)	centrum length * (1.392)	centrum length * (0.804)	centrum length * (0.608)
6	8.798	10.5224	12.2468	7.07359	5.34918
8	10.407	12.4468	14.4865	8.36723	6.32746
8	10.908	13.046	15.1839	8.77003	6.63206
9	10.665	12.7553	14.8457	8.57466	6.48432
9	10.98	13.1321	15.2842	8.82792	6.67584
10	9.663	11.5569	13.4509	7.76905	5.8751
11
13	10.581	12.6549	14.7288	8.50712	6.43325

## Sheet: Boavus occidentalis (YPM 3752)
vertebra #	LAGs	centrum length (mm)	comment	New YPM number
1	10	10.625		59194
2	12	8.609		59195
3	14	9.76		59196
4	19		just a zygantrum	59197
